# Supplementary material for: Intestinal Flora Changes Induced by a High-Fat Diet Promote Activation of Primordial Follicles through Macrophage Infiltration and Inflammatory Factor Secretion in Mouse Ovaries
Source: MDPI journal article supplement (doi:10.3390/ijms23094797), 2022-04-27
Supplement: s1 [file s1]

# Intestinal Flora Changes Induced by a High-Fat Diet Promote Activation of Primordial Follicles through Macrophage Infiltration and Inflammatory Factor Secretion in Mouse Ovaries

## Supplementary Figure and Figure Legend

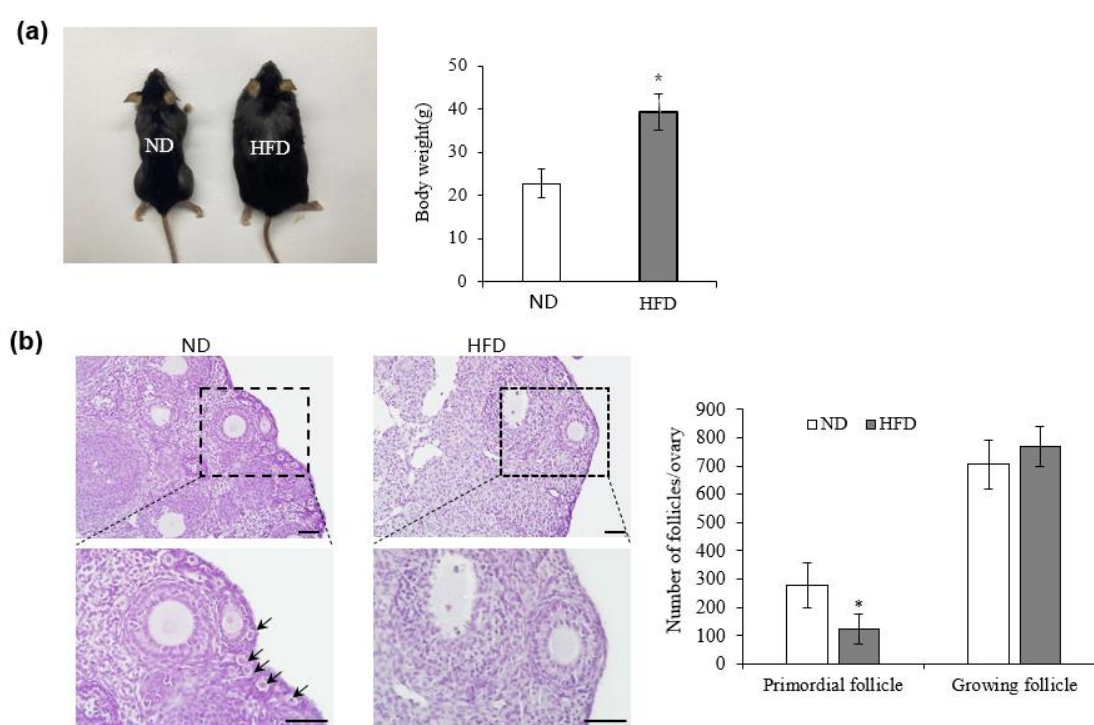

**Figure S1.** HFD induces the overactivation of primordial follicles in an HFD-induced obesity mouse model. **(a)** Average body weight after 12 weeks of ND ( $n = 19$ ) or HFD diet ( $n = 20$ ). **(b)** Representative H&E staining images and follicle number counts showing that the primordial follicle pool in HFD mice was significantly decreased compared to ND mice. Black arrows represent the primordial follicles. Scale bar =  $100\mu\text{m}$ . \*  $P < 0.05$ .

**Table S1.** Primer sets used in this study.

| Gene (Mouse)                  | Primer Sequences (5'–3')       |
|-------------------------------|--------------------------------|
| <i>TNF<math>\alpha</math></i> | F: 5'-CCGATGGGTTGTACCTTGTC     |
|                               | R: TGGAAGACTCCTCCAGGTA         |
| <i>Il-6</i>                   | F: 5'-TGCAAGAGACTTCCATCCAG     |
|                               | R: 5'-TCCACGATTTCAGAGAAC       |
| <i>Il-8</i>                   | F: 5'-ACTCCAAACCTTTCCACCCC     |
|                               | R: 5'-TTCTCAGCCCTCTTCAAAAACCTC |
| <i>Il-1b</i>                  | F: 5'-GCAACTGTTCTGAACTCAACT    |
|                               | R: 5'-ATCTTTTGGGGTCCGTCAACT    |
| <i>Il-18</i>                  | F: 5'-AAGAAAGCCGCCTCAAACCT     |
|                               | R: 5'-AGTGAAGTCGGCCAAAGTTGT    |
| <i>Il-10</i>                  | F: 5'-AGGATGCACATCAAAAGGCTT    |
|                               | R: 5'-GGCCTCGGTTAGGAAGGATAC    |

|              |                                |
|--------------|--------------------------------|
| <i>Il-12</i> | F: 5'-CAATCACGCTACCTCCTCTTTT   |
|              | R: 5'-CAGCAGTGCAGGAATAATGTTTC  |
| <i>Il-4</i>  | F: 5'-CCTCACAGCAACGAAGAACA     |
|              | R: 5'-TGGACTCATTCATGGTGCAG     |
| <i>Il-33</i> | F: 5'-ACTGCATGAGACTCCGTTCTG    |
|              | R: 5'-CCTAGAATCCCGTGGATAGGC    |
| <i>Il-17</i> | F: 5'-GAAGGCAGGAATCACAATC      |
|              | R: 5'-GCCTCCCAGATCACAGA        |
| <i>Ary-1</i> | F: 5'-AACACTCCCCTGACAACCAG     |
|              | R: 5'-GCAAGCCAATGTACACGATG     |
| <i>Gapdh</i> | F: 5'-AGGTTGTCTCCTGCGACTTCA    |
|              | R: 5'-GGGTGGTCCAGGGTTTCTTACT   |
| <i>Il-8</i>  | F: 5'-ACTCCAAACCTTTCCACCCC     |
|              | R: 5'-TTCTCAGCCCTCTTCAAAAACTTC |
| <i>Ccr2</i>  | F: 5'-TAAAAAACCTGGATCGGAACCAA  |
|              | R: 5'-GCATTAGCTTCAGATTTACGGGT  |
| <i>Ccr3</i>  | F: 5'-AACTTGCAAAACCTGAGAAGC    |
|              | R: 5'-ACCATCATGTTGCCAGGAG      |
| <i>Ccr4</i>  | F: 5'-GCCAACAGCCCTGTTTTCTG     |
|              | R: 5'-ACACTGGATTTGAGGCTCCG     |
| <i>Ccr5</i>  | F: 5'-ACTGCTGCCTAAACCCTGTC     |
|              | R: 5'-AGTGGTTCTTCCCTGTTGGC     |
| <i>Ccr6</i>  | F: 5'-CCCGTCTCTCAATGAGCACT     |
|              | R: 5'-AACACGAGAACCACAGCGAT     |
| <i>Ccr8</i>  | F: 5'-ACGTCACGATGACCGACTACT    |
|              | R: 5'-CCCAGCACAAACAAGACGC      |
